# Supplementary material for: Huaju Xiaoji Formula Regulates ERS‐lncMGC/miRNA to Enhance the Renal Function of Hypertensive Diabetic Mice with Nephropathy
Source: Hindawi journal article supplement (doi:10.1155/2024/6942156), 2024-01-01

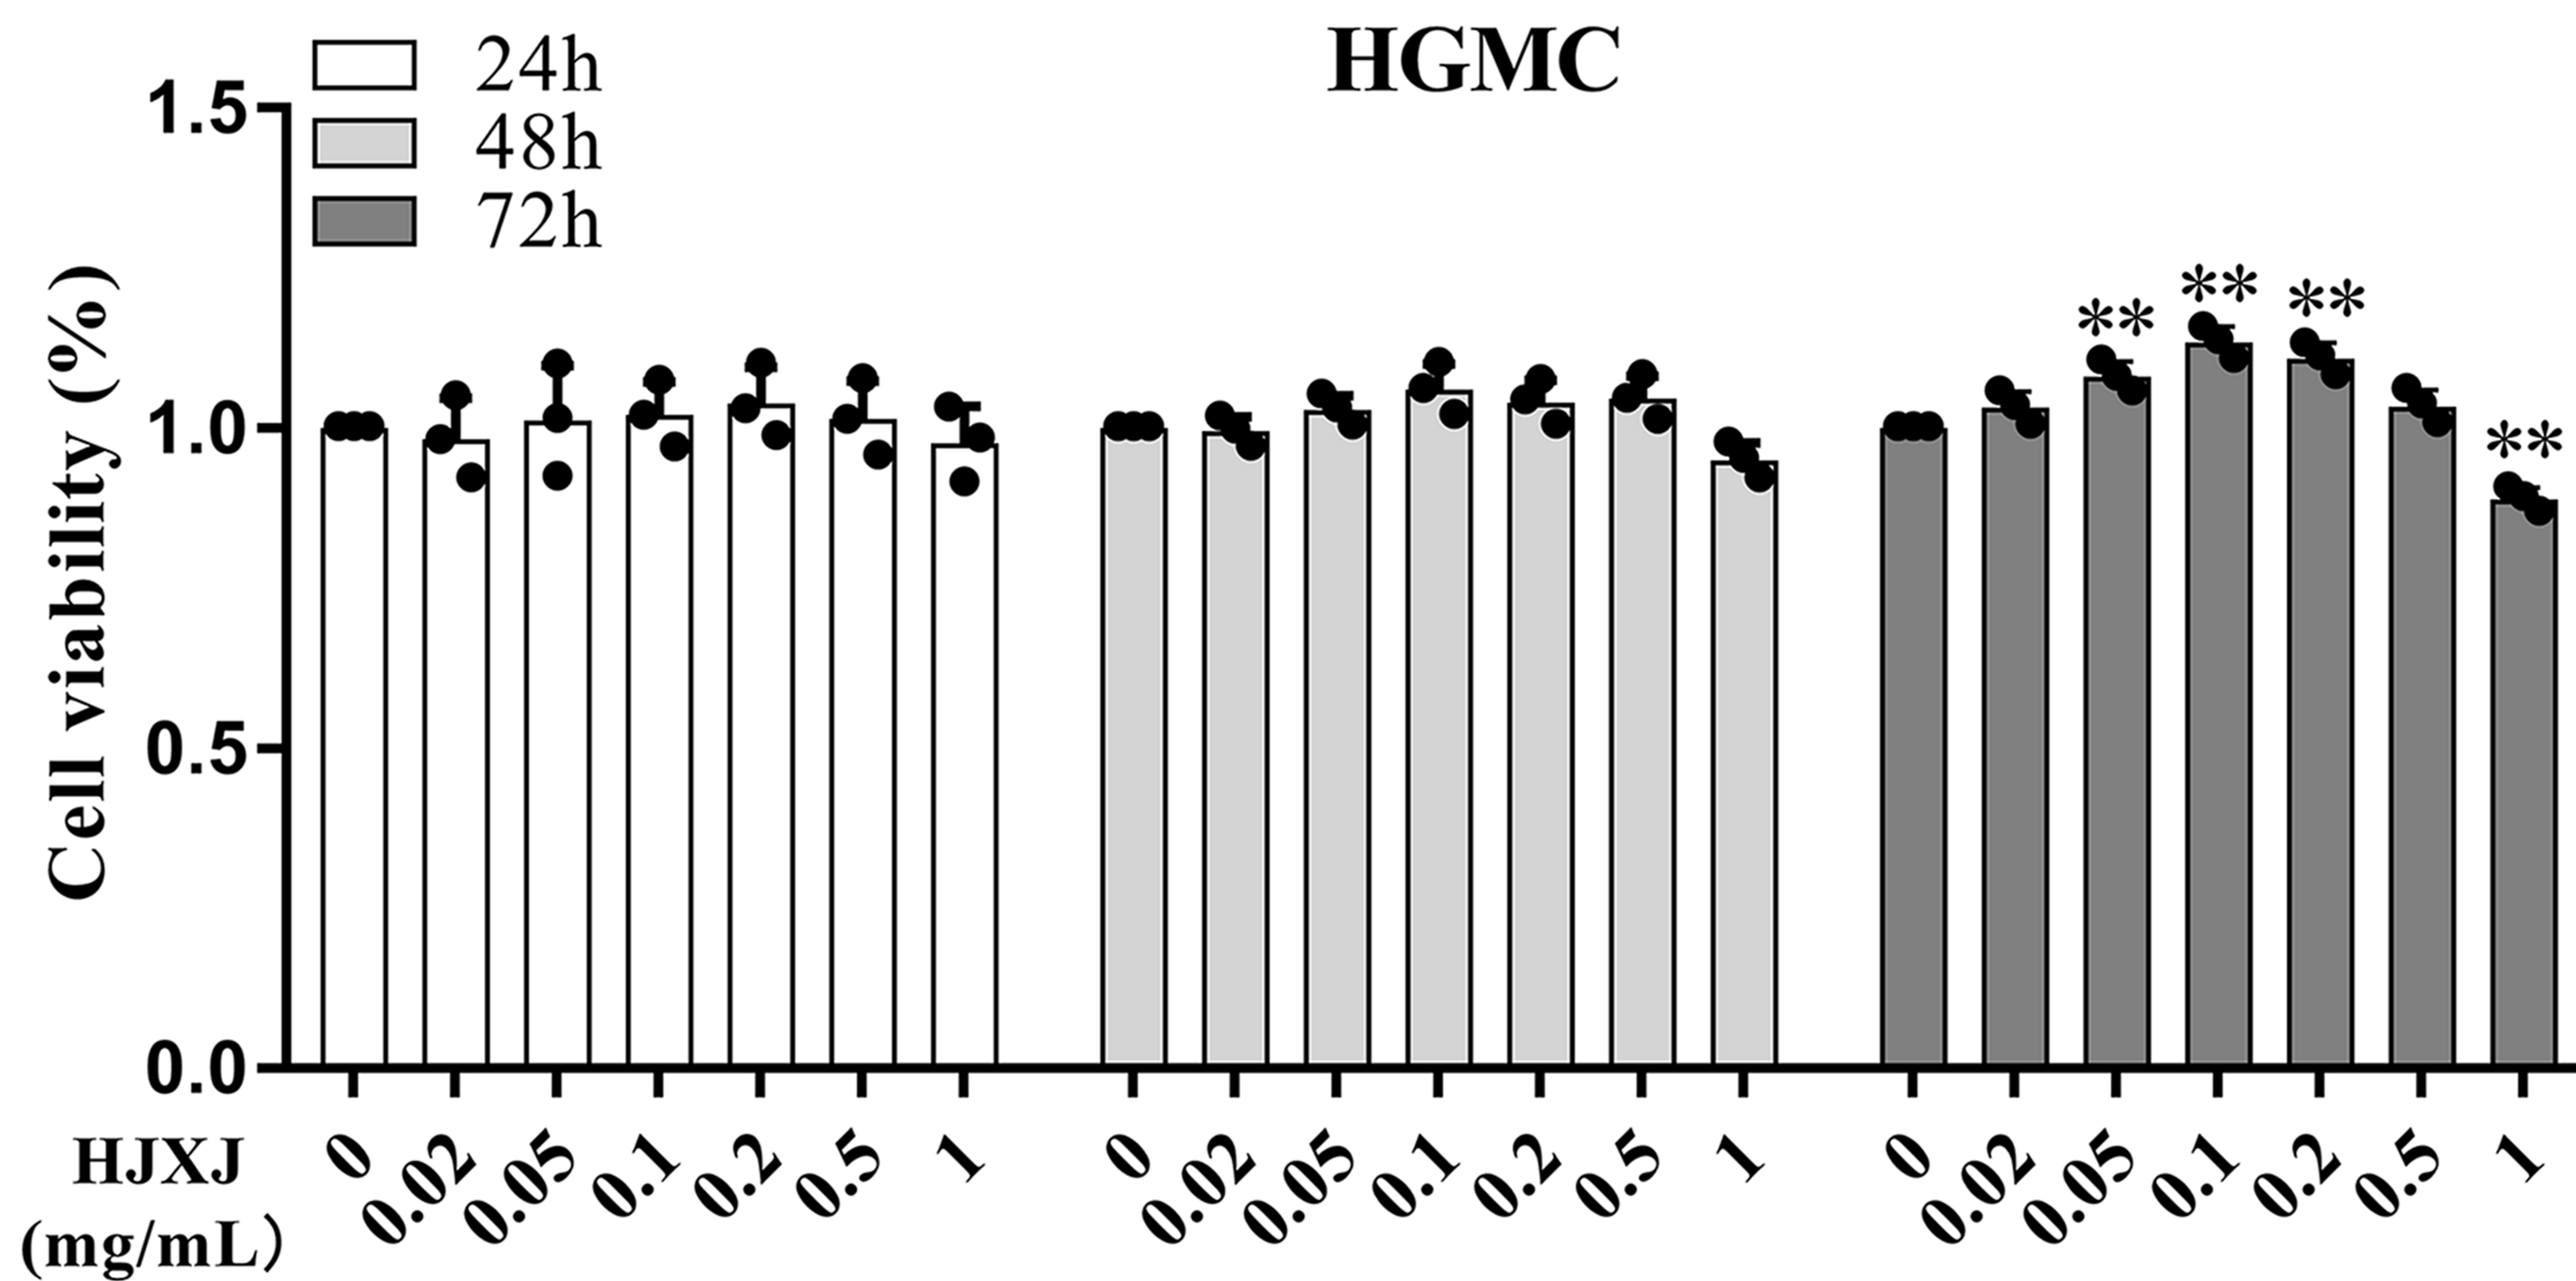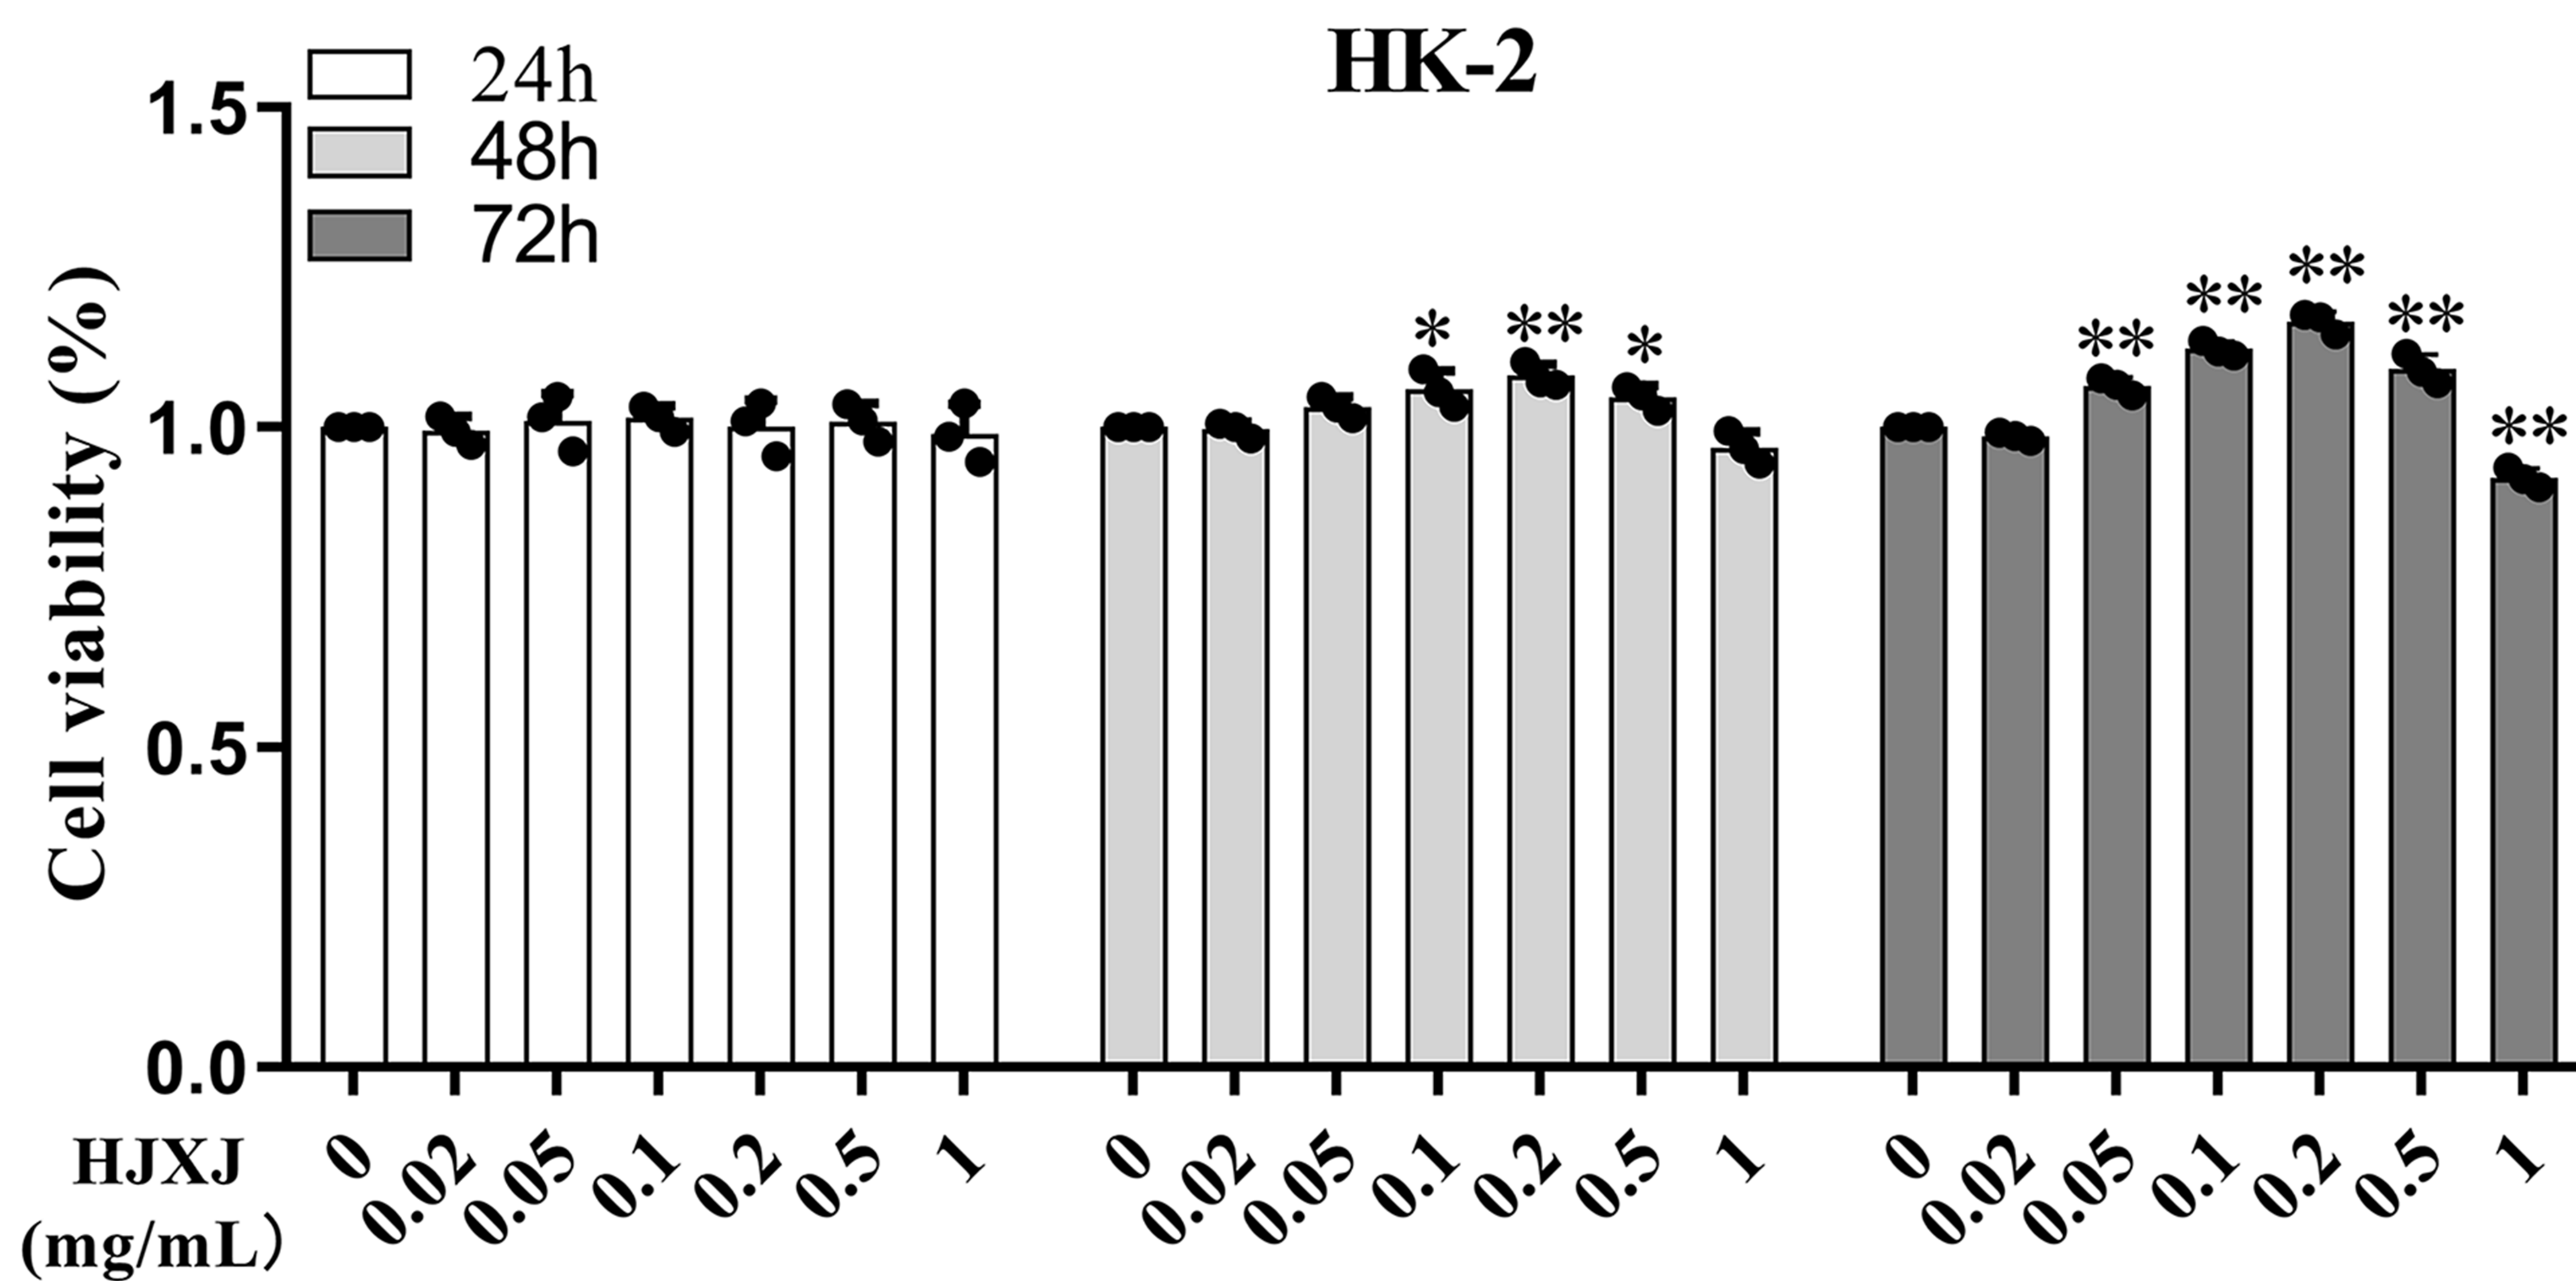

Supplement: f1 [file 6942156.f1.pdf]
